# **The rostral medial frontal cortex is crucial for engagement in consummatory behavior**

Abbreviated Title: Rostral Medial Frontal Cortex and Consummatory Behavior

Samantha R. White<sup>1</sup> and Mark Laubach<sup>1\*</sup>

<sup>1</sup>Department of Neuroscience, American University, Washington, DC, USA, 20016

\*Corresponding author:

Mark Laubach, PhD

[mark.laubach@american.edu](mailto:mark.laubach@american.edu)

Number of pages: 23

Number of figures and tables: 4 figures and 1 table

Words in abstract: 249; introduction: 649; discussion: 1194

Acknowledgements: We thank Drs Linda Amarante, David Kearns, and Jibrán Khokhar for helpful comments on the manuscript.

Conflict of Interest: None

Financial Support: NIH DA046375 to ML

1 **ABSTRACT**

2           The medial frontal cortex (MFC) in rodents emits rhythmic activity that is entrained  
3 to the animal's licking cycle during consumption and encodes the value of consumed  
4 fluids (Horst and Laubach, 2013; Amarante et al., 2017; Amarante and Laubach, 2021).  
5 These signals are especially prominent in the rostral half of the MFC. This region is located  
6 above an orbitofrontal region where mu opioid receptors regulate intake (Mena et al.,  
7 2011; Castro and Berridge, 2017) and reversible inactivation reduces behavioral measures  
8 associated with the incentive value and palatability of liquid sucrose (Parent et al., 2015a).  
9 Here, we examined the effects of reversible inactivation and stimulation of mu opioid  
10 receptors in rostral MFC on behavior in an incentive contrast licking task. Adult male rats  
11 licked to receive access to liquid sucrose, which alternated between high (16%) and low  
12 (4%) values over 30 sec periods. Bilateral infusion of muscimol reduced the total number  
13 of licks emitted over the 30 min test sessions, the time spent actively consuming sucrose,  
14 and the ratio of licks for the higher and lower value fluids. Inactivation did not alter licking  
15 frequency or variability or microstructural measures such as the duration of licking bouts  
16 that are classically associated with the palatability of a liquid reward. Infusions of DAMGO  
17 (1µg/µL) at the same sites had inconsistent behavioral effects across different subjects.  
18 Our findings suggest that the rostral MFC has a distinct role in the control of  
19 consummatory behavior and contributes to persistent consumption and not to the  
20 expression of palatability.

21 **SIGNIFICANCE STATEMENT**

22           The medial frontal cortex (MFC) of rodents has received attention in recent years  
23 and is considered as a singular cortical region with a potential unitary function. Increasing  
24 evidence suggests that MFC is composed of distinct subregions, with unique roles in the  
25 control of behavior. The present study adds to this literature by showing unique effects of  
26 reversibly inactivating the most rostral part of the medial frontal cortex and a lack of  
27 consistent effects of stimulating mu opioid receptors in the subregion. Findings are in  
28 contrast to previous reports on the more ventral orbitofrontal cortex and caudal medial  
29 frontal cortex and are important for understanding the general role of the rodent frontal  
30 cortex and how opioids may act to control behavior.

31 Information about rewarding stimuli is encoded in the rostral part of the medial  
32 frontal cortex (MFC), specifically in the rostral prelimbic area (aka area 32) and the laterally  
33 adjacent medial agranular cortex (Petykó et al., 2009; Horst and Laubach, 2013; Petykó et  
34 al., 2015; Amarante et al., 2017; Amarante and Laubach, 2021). Neurons in this region  
35 change firing rates around the initiation of sustained licking bouts (Petykó et al., 2009) and  
36 rhythmic neural activity, measured in field potentials and spike activity, is synchronized to  
37 the onset of consummatory behavior (Horst and Laubach, 2013). Using an incentive  
38 contrast licking task using liquid sucrose rewards (Flaherty, 1999; Dwyer, 2012), Amarante  
39 et al. (2017) found that consummatory-related activity in rostral MFC develops with  
40 experience, reflects differences in reward value, and is reduced by inactivation of the  
41 rostral MFC in the opposite hemisphere. In a related study, Amarante and Laubach (2021)  
42 found that rhythmic activity during consumption is directionally coherent with the timing  
43 of rhythms in the rostral MFC leading those in the lateral orbitofrontal cortex (OFC) and  
44 further reflects differences in value for sucrose concentration and fluid volume.

45 The rostral MFC region examined in the studies described above has not been  
46 studied using bilateral reversible inactivation with muscimol, a GABA-A agonist (Figure 1).  
47 Therefore, the role of the region in the control of consummatory behavior is not known.  
48 Inactivations in more ventral parts of the frontal cortex using the incentive contrast licking  
49 task were found to disrupt the expression of incentive contrast and behaviors associated  
50 with palatability (Parent et al., 2015a). It is not known if dorsal parts of the rostral MFC  
51 have a role in incentive contrast, palatability, or active engagement in consumption  
52 (Swanson et al., 2019). One of the goals of the present study was to determine how  
53 reversible inactivations of the rostral MFC alter consummatory behavior.

54 There has been a recent interest in understanding the roles of various  
55 neurotransmitter systems in modulating reward processing in the frontal cortex. Opioid  
56 receptors in the frontal cortex have been of special interest in recent years, given the  
57 ongoing opioid crisis. Studies on the effects of the selective mu opioid agonist DAMGO  
58 across various regions of the frontal cortex have reported effects on food intake, patterns

59 of feeding, and overall activity (Mena et al., 2011, 2013; Selleck et al., 2018; Giacomini et  
60 al., 2021, 2022). Castro and Berridge (2017) reported evidence for opioid and orexin “hot  
61 spots” in the frontal cortex, including in the rostral MFC, where infusions of DAMGO or  
62 orexin induce changes in the expression of the immediate early gene Fos and have  
63 corresponding effects on hedonic orofacial reactions and changes in feeding. None of  
64 these studies reported pharmacological data from the dorsal part of the most rostral  
65 MFC. Therefore, in the present study we also examined how local stimulation of mu opioid  
66 receptors might alter behavior in the incentive contrast licking task.

67 Anatomical studies have established that neurons in the rostral MFC project to  
68 brainstem nuclei involved in jaw movements (Yoshida et al., 2009). These connections do  
69 not exist for the more ventral prelimbic and medial orbital regions studied by Parent et al.  
70 (2015a) (e.g. Gabbott et al., 2003; Hoover and Vertes, 2007). If rostral MFC neurons are  
71 involved in modulating brainstem nuclei controlling jaw movements, then perturbations  
72 of rostral MFC might have sensorimotor effects on consummatory behavior, such as inter-  
73 lick intervals (e.g. Gaffield and Christie, 2017) or the ability to engage in licking. We found  
74 that reversible inactivation of the rostral MFC has distinct effects compared to inactivating  
75 the ventrally located medial OFC. Rather than affecting measures of palatability,  
76 inactivation reduced engagement in consumption without changing sensorimotor  
77 measures. The effects of rostral MFC inactivation might best be described in terms of  
78 abulia (Berrios and Gili, 1995), a reduction in the expression of “willful” and goal-directed  
79 movements. Infusions of DAMGO had no consistent effect on any behavioral measures  
80 across rats.

## 81 **MATERIALS AND METHODS**

82 All procedures were approved by the Animal Care and Use Committee at American  
83 University (Washington, DC). Procedures conformed to the standards of the National  
84 Institutes of Health Guide for the Care and Use of Laboratory Animals. All efforts were  
85 taken to minimize the number of animals used and to reduce pain and suffering.

## 86 **Animals**

87           Ten male rats (seven Sprague-Dawley (Charles River), three Long Evans (Envigo)) of  
88 400-450 grams were used in this study. Animals were housed individually and kept on a  
89 12/12 h light/dark cycle switching at 7:00 AM and 7:00 PM. Upon arrival, animals were  
90 given one week of habituation to their new environment with free access to rat chow  
91 followed by daily handling for one week. After habituation and initial daily handling,  
92 animals had regulated access to food to maintain their body weights at approximately  
93 90% of their free-access weights. Rats typically received 14–18 g of food each day around 5  
94 pm and were weighed daily throughout the period of training and testing in an incentive  
95 contrast licking task. Animals had free access to water throughout the experiments. Of the  
96 rats used in this study, one rat was removed due to an unintentional unilateral infusion  
97 from a blockage in the guide cannula.

## 98 **Behavioral Apparatus**

99           All animals were trained in sound-attenuating behavioral boxes (ENV-008; Med  
100 Associates) containing a single horizontally placed spout located on one wall at 6.5 cm  
101 from the floor and a house light at the top of the box. Control of pumps and behavioral  
102 quantification was done using a MedPC system version IV (Med Associates). The licking  
103 spout was custom built to allow the convergence of two independent solution lines  
104 stemming from two independent pumps at a single point. Licking was tracked optically as  
105 breakage of an infrared beam by the tongue between a custom built emitter/detector  
106 placed directly in front of the licking spout. Solution lines were connected to 60cc syringes  
107 and solution was made available to animals by lick-triggered, single speed pumps (PHM-  
108 100; Med Associates) which drove syringe plungers. Each lick activated a pump which  
109 delivered roughly 30  $\mu$ L per 0.5 second activation.

## 110 **Behavioral Task**

111           After rats could produce >700 licks for 16% sucrose in a single session, they were

112 conditioned in the incentive contrast licking task (Figure 2A). The task used in these  
113 experiments is the same as described previously (Parent et al., 2015a; Amarante et al.,  
114 2017). Briefly, animals were placed into the operant chamber for 30 min and had constant  
115 access to the spout. Two independent pumps delivered sucrose solution to the same  
116 spout and were loaded with syringes containing either high value 16% (wt/vol) sucrose  
117 solution or low value 4% (wt/vol) sucrose solution. Licking at the spout initiated a 30-s  
118 epoch of access to the high value solution. Each lick was recorded and a lick occurring  
119 after the end of the 30-s epoch triggered a 30-s epoch of access of low value sucrose.  
120 These epochs of access continually switched back and forth between pumps and provided  
121 alternating access to high and low value solutions. At the end of the 30 min session, the  
122 house light turned off and animals stopped receiving sucrose solution. Quantification of  
123 behavior was implemented via analysis of metrics for consumption (time on task, total  
124 licks, and proportion of high value licks) and metrics of licking microstructure (duration of  
125 licking bouts, number of licking bouts, and intra-bout licking rates).

## 126 **Surgery**

127 Prior to cannulation, animals were given 2–3 days of free access to rat chow and  
128 water. Anesthesia was induced by an injection of diazepam (5 mg/kg, IP) and maintained  
129 with isoflurane (3.0%; flow rate 5.0 cc/min). The scalp was shaved clean and animals were  
130 injected with a bolus of carprofen subcutaneously. Animals were placed into a stereotaxic  
131 frame using non-penetrating ear bars and the skull was covered with iodine for 1 min.  
132 Iodine was wiped clean from the scalp and the eyes were covered with ophthalmic  
133 ointment to prevent drying over the span of the surgery. Lidocaine (0.5 mL) was injected  
134 under the scalp and an incision was made longitudinally along the skull. The skin was  
135 retracted laterally and all tissue was cleaned from the surface of the scalp. The skull was  
136 leveled by adjusting the stereotaxic apparatus to ensure bregma and lambda were within  
137 the same horizontal plane. Four skull screws were placed along the edges of the skull for  
138 support and adhesion of the implant to the skull. Craniotomies were drilled bilaterally in

139 the frontal skull plates over the rostral medial frontal cortex and 26 gauge stainless steel  
140 guide cannula (Plastics One) were lowered into rostral MFC (coordinates from bregma AP  
141 +3.2mm, ML +/1.2mm, DV -2.0mm surface of the brain at a 12-degree posterior angle)  
142 (Paxinos and Watson, 2014). The guide cannula contained a 33 gauge stainless steel wire  
143 (“dummy cannula”) that extended 0.4mm past the tip of the guide cannula. Craniotomies  
144 were sealed using cyanoacrylate (Slo-Zap) and an accelerator (Zip Kicker), and methyl  
145 methacrylate dental cement (AM Systems) was applied and affixed to the skull via the skull  
146 screws. Animals were given Carprofen (5 mg/kg, s.c.) for postoperative analgesia. Animals  
147 recovered from surgery in their home cages for at least 1 week with full food and water,  
148 and were weighed and monitored daily for 1 week after surgery. After 1 week, animals’  
149 body weights returned to presurgical levels, restricted access to rat chow was reinstated,  
150 and animals continued with daily behavioral testing sessions.

## 151 **Drug Infusions**

152 Following recovery from surgery (5-7 days) and a period of one week reacclimation  
153 to the task with restricted food access, a series of controls were performed on all rats.  
154 First, animals were exposed to the same duration and levels of isoflurane gas used during  
155 drug infusions to control for exposure to isoflurane. Second, a PBS control was carried out  
156 where the same volume of vehicle without drug was infused into the rostral MFC while the  
157 animals were anesthetized. Finally, on test day, animals were anesthetized via isoflurane  
158 and drug was infused centrally into the rostral MFC. Following test day, recovery sessions  
159 were carried out. Each rat received between 3-4 sessions of drug infusions during the time  
160 of this study. Drugs used in this study included muscimol (1.0µg/µL) and DAMGO ([d-Ala<sup>2</sup>,  
161 N-Me-Phe<sup>4</sup>, Gly<sup>5</sup>-ol]-enkephalin) (1.0µg/µL). All drugs were obtained from Tocris and made  
162 into solutions using sterile PBS with pH 7.4. Concentrations were based on published  
163 studies (Parent et al., 2015a; Giacomini et al., 2021).

164 Infusions were performed by inserting a 33-gauge injector into the guide cannula.  
165 The injector extended 0.4mm past the tip of the guide cannula. A volume of 1.0uL of fluid



166 (Parent et al., 2015a) was delivered at a rate of 0.25uL/min with a syringe infusion pump  
167 (KDS Scientific). The injector was connected to a 10 uL Hamilton syringe via 0.38 mm  
168 diameter polyethylene tubing. After infusion was finished, the injector was left in place for  
169 at least 2 minutes to allow for diffusion of the fluid. The injector was slowly removed and  
170 the dummy cannula was replaced. Rats were tested in the incentive contrast licking task 1  
171 hour after the PBS and muscimol infusions or 20-30 minutes after DAMGO infusions.

## 172 **Statistical analysis**

173 All data were analyzed using Python (Anaconda distribution:  
174 <https://www.continuum.io/>). Analyses were run as Jupyter notebooks (<http://jupyter.org/>).  
175 Statistical testing was performed using DABEST, a Python package for data analysis using  
176 bootstrap-coupled estimation. Two-sided, paired permutation tests were used to compare  
177 saline and drug infusion conditions (Ho et al., 2019). 5000 bootstrap samples were taken;  
178 the confidence interval is bias-corrected and accelerated. The p-values reported are the  
179 likelihood of observing the effect size if the null hypothesis of zero difference is true. For  
180 each p-value, 5000 reshuffles of the control and test labels were performed. Results are  
181 displayed as estimation plots produced by DABEST. They present the raw data and the  
182 bootstrap confidence interval of the effect size (the difference in means) as a single  
183 integrated plot.

## 184 **Behavioral Data Analysis**

185 Primary measures are described in Figure 2C. Analysis of licking used custom  
186 scripts written in Python. Inter-lick intervals greater than 1 s or less than 0.09 s were  
187 excluded from the analysis. Detection and quantification of licking bouts were done as in  
188 previous studies (Gutierrez et al., 2010; Horst and Laubach, 2013; Parent et al., 2015a).  
189 Specifically, bouts were defined as having at least three licks within 300 ms and with an  
190 interbout interval of 1s or longer. Behavioral measures included time on task (the total  
191 time rats spent engaged in sustained licking), total licks across the session, proportion of

192 high value licks out of the total licks, the duration and number of licking bouts, and the lick  
193 frequency (inverse of the median inter-lick interval).

#### 194 **Confirmation of Cannula Placement**

195 At the termination of experiments, animals were initially anesthetized with  
196 isoflurane gas and injected intraperitoneally with Euthasol. Animals were transcardially  
197 perfused first with 500 ml of cold saline solution followed by 500 ml of cold 4%  
198 paraformaldehyde. Brains were removed and post-fixed in a mixture containing 4%  
199 paraformaldehyde, 20% sucrose, and 20% glycerol. Brains were then cut into 100  $\mu$ m-thick  
200 coronal slices using a freezing microtome. Brain sections were mounted onto gelatin-  
201 coated slides and Nissl stained via treatment with thionin. Thionin-treated slices were  
202 dried through a series of alcohol steps and cleared with Xylene. Slides were covered with  
203 permount and coverslipped. Sections were imaged using a Tritech Research scope (BX-51-  
204 F), Moticam Pro 282B camera, and Motic Images Plus 2.0 software. The most ventral point  
205 of the injection bolus was compared against the Paxinos and Watson atlas to confirm  
206 coordinates.

#### 207 **RESULTS**

##### 208 **Anatomical definition of the rostral medial frontal cortex**

209 This study focused on a rostral region of the MFC that has not been previously  
210 examined using bilateral reversible inactivation or intra-cortical pharmacology (Figure 1).  
211 The prelimbic cortex spans from AP +5.20 to +2.50 mm relative to Bregma. At the most  
212 rostral limit, ahead of AP +5.20, the dorsal medial cortex is considered as the frontal pole  
213 and is characterized by a lack of a clear layer 6 (Swanson, 2004). Regions of MFC caudal to  
214 +4.80 but ahead of 3.60 is defined here as rostral MFC based on the following criteria: (i)  
215 no identifiable anterior forceps of the corpus callosum, (ii) six identifiable cortical layers,  
216 and (iii) the rhinal fissure is complete or nearly complete. The caudal MFC is posterior to  
217 the rostral MFC. Anatomical sections at this level of the frontal cortex show the following

218 criteria: (i) presence of the anterior forceps of the corpus callosum, (ii) a clearly developed  
219 layer 6, and (iii) and a partial rhinal fissure.

### 220 **Inactivation of rostral MFC reduces engagement in consumption**

221 Three behavioral measures associated with consummatory engagement were  
222 affected by bilateral reversible inactivation of the rostral MFC (Figure 2C). Muscimol  
223 reduced the overall time rats spent licking in the task (Figure 3A; paired mean difference: -  
224 49.1; p-value: 0.022; 95%CI: -82.2, -19.6). Inactivation also reduced the total number of  
225 licks rats emitted across the testing sessions (Figure 3B; paired mean difference: -335.0 ; p-  
226 value: 0.0196; 95%CI: -576.0, -138.0). Finally, inactivation reduced the proportion of high  
227 value licks (Figure 3C; paired mean difference: -0.0425; p-value: 0.0396; 95%CI: -0.0619,  
228 0.0114). Table 1 demonstrates that the data points where there was an opposite effect of  
229 muscimol for individual rats (increases rather than decreases in behavioral measures and  
230 vice versa) are not driven by a singular rat.

### 231 **Inactivation of rostral MFC did not alter palatability or sensorimotor behavior**

232 Bilateral infusion of muscimol in the rostral MFC had no effect on the rate at which  
233 rats licked for sucrose, the inverse of the median inter-lick interval (Figure 3D; paired  
234 mean difference: -0.1 ; p-value: 0.365; 95%CI: -0.347, 0.105). Furthermore, inactivation of  
235 rostral MFC had no effect on the number of bouts (lick clusters) across the session (Figure  
236 3E; paired mean difference: -0.0581; p-value: 0.737; 95%CI: -0.429, 0.23) or the duration of  
237 licking bouts (Figure 3F; paired mean difference: -16.6; p-value: 0.225; 95%CI: -36.6, 11.4).

### 238 **Stimulation of mu opioid receptors had no consistent effects on behavior**

239 Animals received infusions of the mu opioid receptor agonist DAMGO at the same  
240 sites where muscimol was infused. In contrast to the results of inactivation reported above,  
241 infusions of DAMGO had no consistent effects on any behavioral measure in the incentive  
242 contrast licking task. There were no group-level effects observed for the total time rats

243 spent licking (Figure 4A; paired mean difference: -8.0; p-value: 0.807; 95%CI: -59.2, 53.9),  
244 the total number of licks emitted across the testing sessions (Figure 4B; paired mean  
245 difference: -71.6; p-value: 0.694; 95%CI: -395.0, 264.0), and the relative proportions of  
246 higher and lower value licks (Figure 4C; paired mean difference: -0.0282; p-value: 0.108;  
247 95%CI: -0.0747, -0.00624). Infusions of DAMGO also had no consistent effects on inter-lick  
248 intervals (Figure 4D; paired mean difference: 0.000397; p-value: 1.0; 95%CI: -0.162, 0.16),  
249 the number of bouts (Figure 4E; paired mean difference: -0.124; p-value: 0.68; 95%CI: -  
250 0.586, 0.62), and the durations of licking bouts (Figure 4F; paired mean difference: 5.78; p-  
251 value: 0.524; 95%CI: -6.44, 22.8). Table 1 demonstrates that the data points where there  
252 were variable effects for individual rats (increases rather than decreases in behavioral  
253 measures and vice versa) are not driven by a singular rat or by a pattern of baseline  
254 behavior. There was also no evidence that variability in behavioral pattern could be  
255 explained by differences in precise anatomical location with respect to any axis  
256 (dorsal/ventral, medial/lateral, anterior/posterior) in the targeted rostral prelimbic cortex.

## 257 **DISCUSSION**

258 In the current study, we sought to examine the role of the rostral medial frontal  
259 cortex (Figure 1) in an incentive contrast licking task via reversible inactivation and  
260 stimulation of mu opioid receptors. Adult male rats licked to receive access to liquid  
261 sucrose alternating between high (16%) and low (4%) values over 30 second periods, and  
262 learned to lick persistently when the higher value fluid was available. Bilateral infusion of  
263 muscimol reduced consummatory engagement, including the time spent licking, the total  
264 number of licks per session, and the proportion of licks for the high value fluid (Figure 3A-  
265 C). By contrast, infusions of DAMGO (1 $\mu$ g/ $\mu$ L) at the same locations had no consistent  
266 effects on any measures of task performance across rats (Figure 4A-C). Importantly,  
267 inactivation via muscimol and stimulation of mu receptors by DAMGO did not alter  
268 measures of gross sensorimotor function or fluid palatability, including licking frequency  
269 and the number and duration of sustained licking bouts (Figure 3D-F, Figure 4D-F).

270           The data reported here are important for understanding several electrophysiology  
271 studies on the rostral MFC (Horst and Laubach, 2013; Amarante et al., 2017; Amarante and  
272 Laubach, 2021). Horst and Laubach (2013) reported the highest proportion of recording  
273 sites that show phase locking around bouts of licking are within the rostral prelimbic sites  
274 (ahead of AP +3.6). Amarante et al. (2017) reported that neural activity in the rostral medial  
275 frontal cortex further encodes the value of liquid sucrose and a related study by  
276 Amarante and Laubach (2021) further showed that rostral MFC activity is synchronized  
277 with, and may even drive variability in, rhythmic activity in the lateral orbitofrontal cortex  
278 (Amarante and Laubach, 2021). These studies assumed that inactivation of the rostral MFC  
279 would disrupt licking microstructure and measures of palatability, based on studies  
280 described below that focused on the more ventral medial orbital cortex (Parent et al.,  
281 2015a). Reversible inactivations carried out in Amarante et al. (2017) were done  
282 unilaterally, to examine effects of rostral MFC activity on neural signals in the opposite  
283 hemisphere. The unilateral infusions in that study had no major effects on behavior, which  
284 was important to rule out effects in the opposite hemisphere due to changes in behavior.  
285 The present results establish that rather than mediating effects on palatability and  
286 incentive contrast, the neural signals reported by Amarante et al. (2017) and Amarante  
287 and Laubach (2021) reflected the animals' engagement in the licking task, a process that  
288 could reflect abulia (a lack of willful or decisive action) or apathy, and very much supports  
289 the interpretation in the Amarante et al. (2017) and Amarante and Laubach (2021) studies  
290 of neural activity in the rostral MFC as being sensitive to "response vigor".

291           The findings of this study are also important for understanding the roles of various  
292 parts of the rostral MFC in the control of consummatory behaviors. Pharmacological  
293 perturbations of the dorsal rostral MFC was found to be distinct from findings in nearby  
294 cortical areas such as the medial orbital (Parent et al., 2015a, 2015b), and ventral  
295 orbital, caudal prelimbic and infralimbic cortices (Giacomini et al 2022). In the studies by  
296 Parent and colleagues, inactivation of the medial orbital cortex (which was referred to by  
297 the authors as rostral medial prefrontal cortex) resulted in dramatically fragmented licking

298 behavior, affecting bout duration and the variability of inter-lick intervals, and also  
299 disrupted the expression of incentive contrast. As shown in Figure 3 of Parent et al.  
300 (2015a) and Figure 2 of Parent et al. (2015b), most infusions of muscimol and other drugs  
301 were ventral to the locations in the present study. The medial orbital region impacts  
302 measures of palatability and sensorimotor behavior. By contrast, inactivation of the rostral  
303 prelimbic area, studied here, altered how long the rats were engaged in consummatory  
304 behavior (time spent licking and total licks per session) and not measures associated with  
305 palatability or sensorimotor function. These findings are also distinct from inactivation of  
306 caudal regions of MFC in a study by Giacomini et al (2022). They reported that bilateral  
307 infusions of muscimol into the prelimbic and infralimbic cortices in the caudal half of the  
308 MFC had no effect on sucrose pellet consumption, providing further evidence for a  
309 distinction between the role of rostral and caudal MFC in feeding. Together, these findings  
310 suggest that the adjacent medial orbital and prelimbic areas have distinct roles in  
311 consummatory behavior.

312         A handful of studies have investigated the role of the opioid system of the MFC in  
313 the regulation of consummatory behaviors (Selleck and Baldo, 2017). The MFC is dense  
314 with receptors for the mu opioid system (Lewis et al., 1983), and pharmacological  
315 manipulations of these cortical opioid receptors with the selective mu opioid agonist  
316 DAMGO have suggested that specific regions of the MFC and nearby OFC play a role in  
317 regulating feeding (Mena et al., 2011, 2013; Selleck et al., 2018; Giacomini et al., 202). For  
318 example, Mena et al. (2011) demonstrated that infusions of DAMGO in ventral prelimbic  
319 and lateral OFC areas potentiate feeding and lead to increases in total food intake;  
320 number of eating bouts (periods of sustained eating); and reduces the duration of these  
321 eating bouts; these measures suggest there's an overall enhancement of the positive  
322 hedonic, or 'liking' of food (Castro and Berridge, 2017). Mena et al. (2013) further showed  
323 these effects are replicated with infusions of DAMGO into the infralimbic cortex and may  
324 be mediated by glutamatergic connections to subregions of the hypothalamus. Most  
325 recently, Giancomi et al. (2022) reported that reversible inactivation of the caudal

326 prelimbic and infralimbic cortices have inverse effects on the potentiating effects of  
327 DAMGO in the agranular insular cortex. Inactivation of the infralimbic cortex positively  
328 augmented effects of DAMGO and, by contrast, inactivation of the prelimbic cortex  
329 reduced effects of DAMGO in the agranular insular cortex. The sites studied by Giancomi  
330 were more than 1 mm caudal to the focus of the present study. Together, these results  
331 support the idea that, despite falling under the umbrella of a single term “medial frontal  
332 cortex”, subregions of MFC across a rostral/caudal and dorsal/ventral axis contribute  
333 differently to reward guided consummatory behavior. and further support the  
334 heterogeneity.

335         Our results following infusions of DAMGO into the rostral MFC are distinct from all  
336 of these published studies. The lack of effects following DAMGO in the rostral MFC (rostral  
337 prelimbic cortex) might reflect differences in the concentration of mu opioid receptors,  
338 described as “hot spots” by Castro and Berridge (2017), in the rostral MFC and other  
339 regions such as the more caudal or lateral regions studied by Mena, Giancomi, and  
340 colleagues. It is also possible that our infusions crossed “hot spots” leading to an unclear  
341 modulation of behavior. In any case, there have been only a few studies on cortical mu  
342 receptors and their role in the control of behavior, and the findings across these studies  
343 and the present one suggest that mu opioid receptors have distinct effects in different  
344 parts of the rostral frontal cortex. Notably, a recent study on synaptic transmission by the  
345 mu opioid system reported distinct effects of DAMGO on GABA signaling in the medial and  
346 lateral OFC (Lau et al., 2020). More studies on this neurotransmitter system, which is  
347 crucial for understanding opioid abuse and addiction, are needed.

348 **FIGURES**

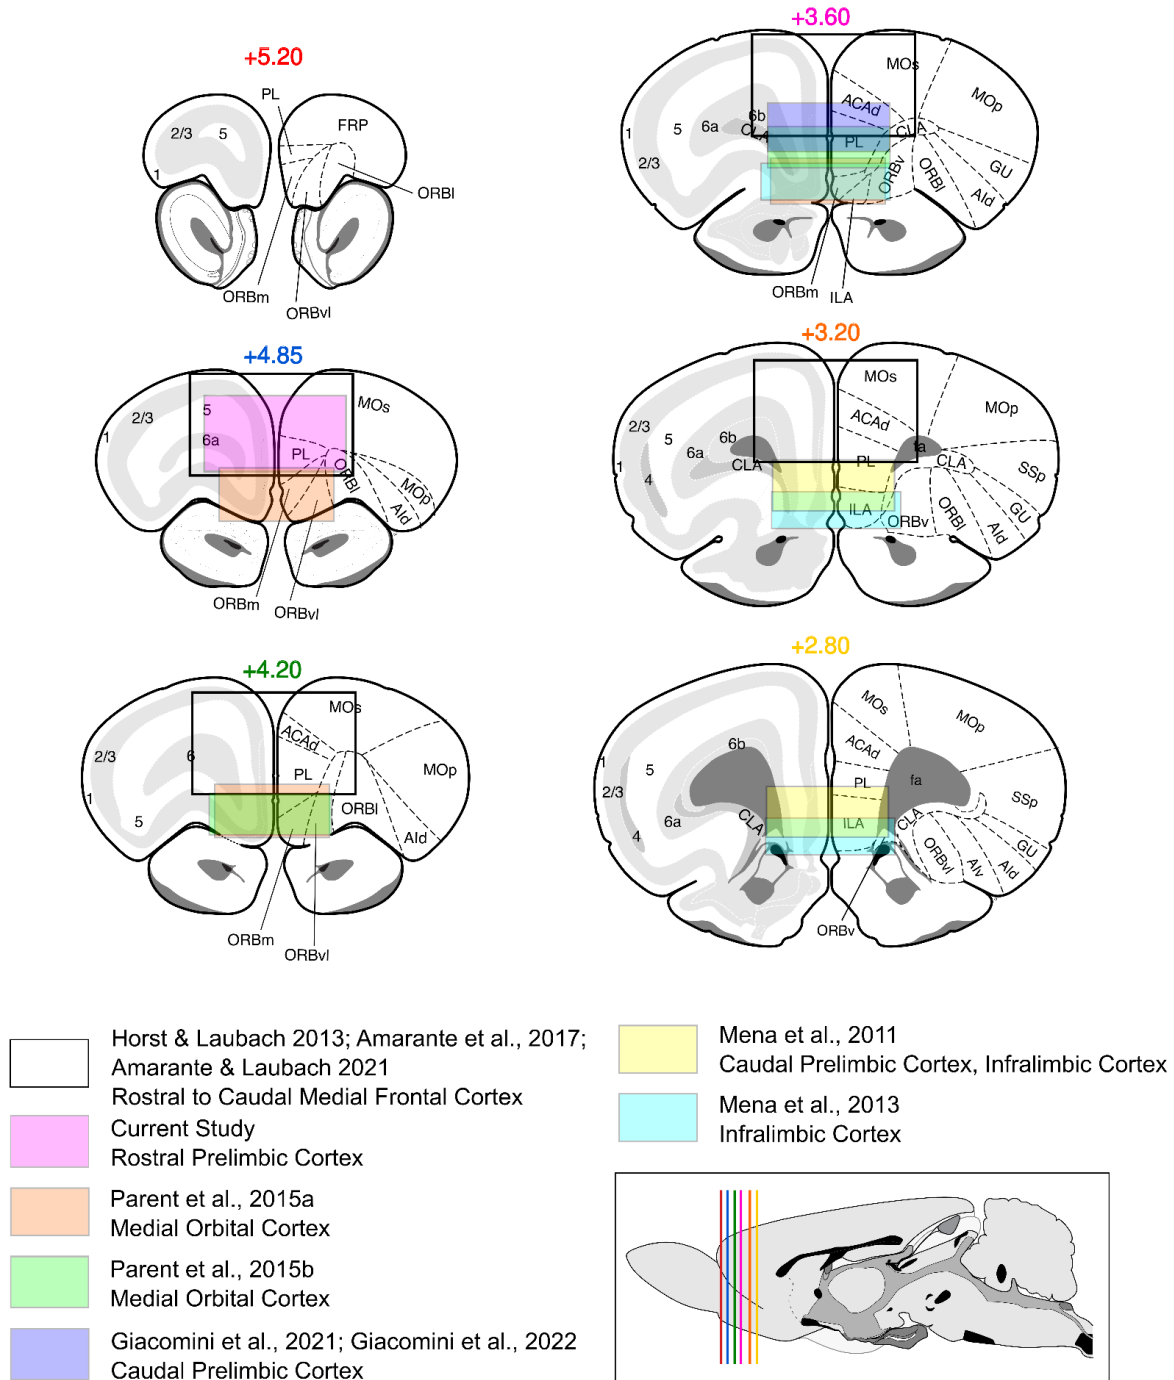

349 **Figure 1: Frontal cortical anatomy for the context of this study.** Previous work in the  
350 medial frontal cortex spans a rostral to caudal axis, as well as a dorsal and ventral axis.



351 This figure depicts the locations of previous studies on this cortical region and adjacent  
352 regions that used consummatory tasks. Neural recordings by Horst & Laubach (2013),  
353 Amarante et al. (2017), and Amarante & Laubach (2021) (black outlines) were made in the  
354 rostral medial frontal cortex, in the prelimbic and medial agranular cortices. Parent et al.  
355 (2015a,b; orange, green) targeted ventral portions of rostral MFC, considered to be medial  
356 orbital cortex. Mena et al. (2011) (yellow) targeted caudal MFC and were more ventral on  
357 the medial wall, at the border between the prelimbic and infralimbic cortices. Mena et al.  
358 (2013) (light blue) targeted the infralimbic cortex. Giacomini et al. (2021, 2022; dark blue)  
359 studied differences across multiple regions of the frontal cortex, but prelimbic sites were  
360 restricted to the caudal part of the prelimbic cortex. The current study (pink) targeted the  
361 rostral prelimbic cortex. Colored boxes highlight the regions associated with different  
362 studies. The left side of each coronal slice represents the laminar organization of the  
363 cortex according to the Swanson Atlas. The right side of each slice represents area  
364 delineations of cortical regions according to the Swanson Atlas and Paxinos Atlas.  
365 Abbreviations, according to the Swanson Atlas: ACA<sub>d</sub>: anterior cingulate area, dorsal part,  
366 AI<sub>d</sub>: agranular insular area, dorsal part, AI<sub>v</sub>: agranular insular area, ventral part, CLA:  
367 claustrum, fa: corpus callosum, anterior forceps, FRP: frontal pole, cerebral cortex, GU:  
368 gustatory area, ILA: infralimbic area, MOp: primary somatomotor area, MOs: secondary  
369 somatomotor areas, ORBl: orbital area, lateral part, ORBm: orbital area, medial part,  
370 ORBv: orbital area, ventral part, ORBvl: orbital area, ventrolateral part, PIR: piriform area,  
371 PL: prelimbic area, SSp: primary somatosensory area, SSp-m: primary somatosensory  
372 area, mouth region.

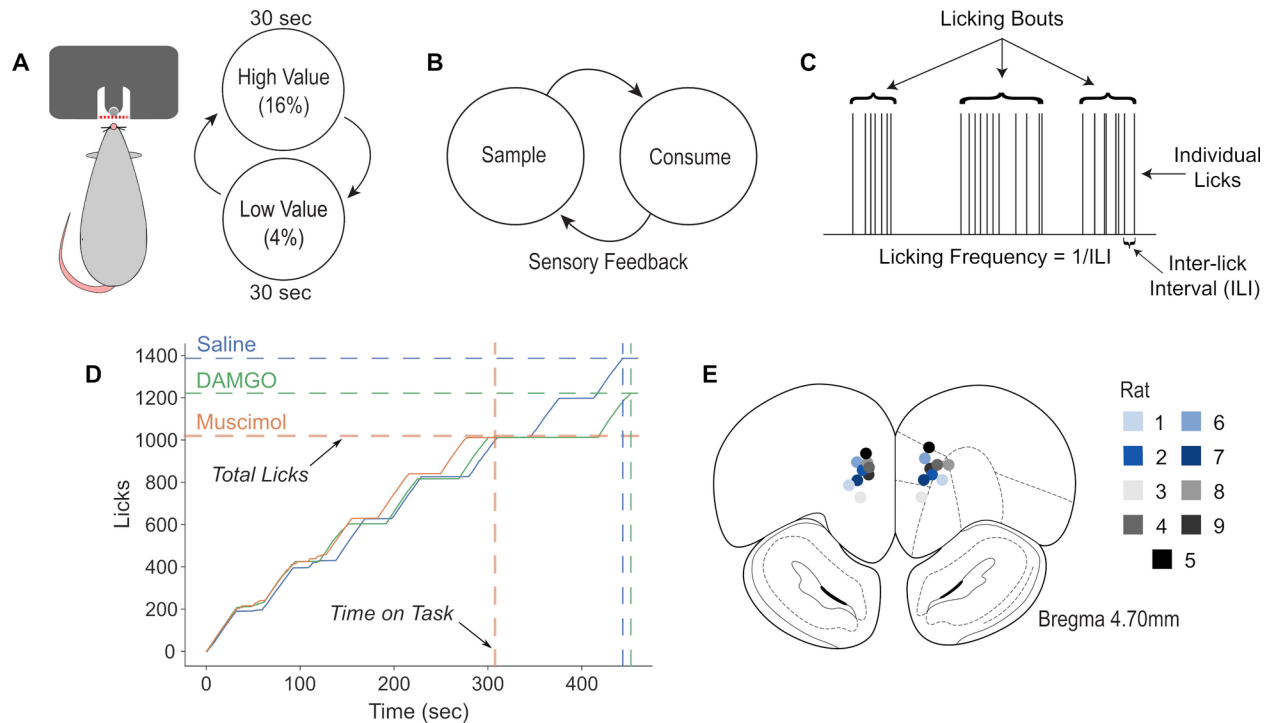

373 **Figure 2: Task, Lick Microstructure, and Cannula Placement.**

374 **(A)** Rats licked on a single spout and received access to solutions containing relatively high  
 375 (16% wt/vol) or low (4%) sucrose. The two fluids were presented in alternating 30-s epochs  
 376 at the same spout. **(B)** Conceptual model of task. Rats lick to sample fluid during initial  
 377 learning and later when low value reward is available. They show increased licking for the  
 378 higher value reward over the first several days of training (Figure 1C in Parent et al.,  
 379 2015a). They transition between sampling and consuming after initial training. Shifts  
 380 between the states is guided by sensory feedback (taste/ flavor of fluid). The proportion of  
 381 high value licks reflects consummatory licking. **(C)** Animals consumed sucrose by emitting  
 382 bouts of licks. Key measures of licking microstructure are indicated. **(D)** Total Licks and  
 383 Time on Task are depicted from a session using a cumulative record plot. The data are  
 384 from the rat with the median value for Time On Task. **(E)** Histological confirmation  
 385 revealed that the cannula across the nine subjects were consistent in the rostral medial  
 386 frontal cortex (+4.7 AP, +/-0.7 ML, and -2.0 DV).

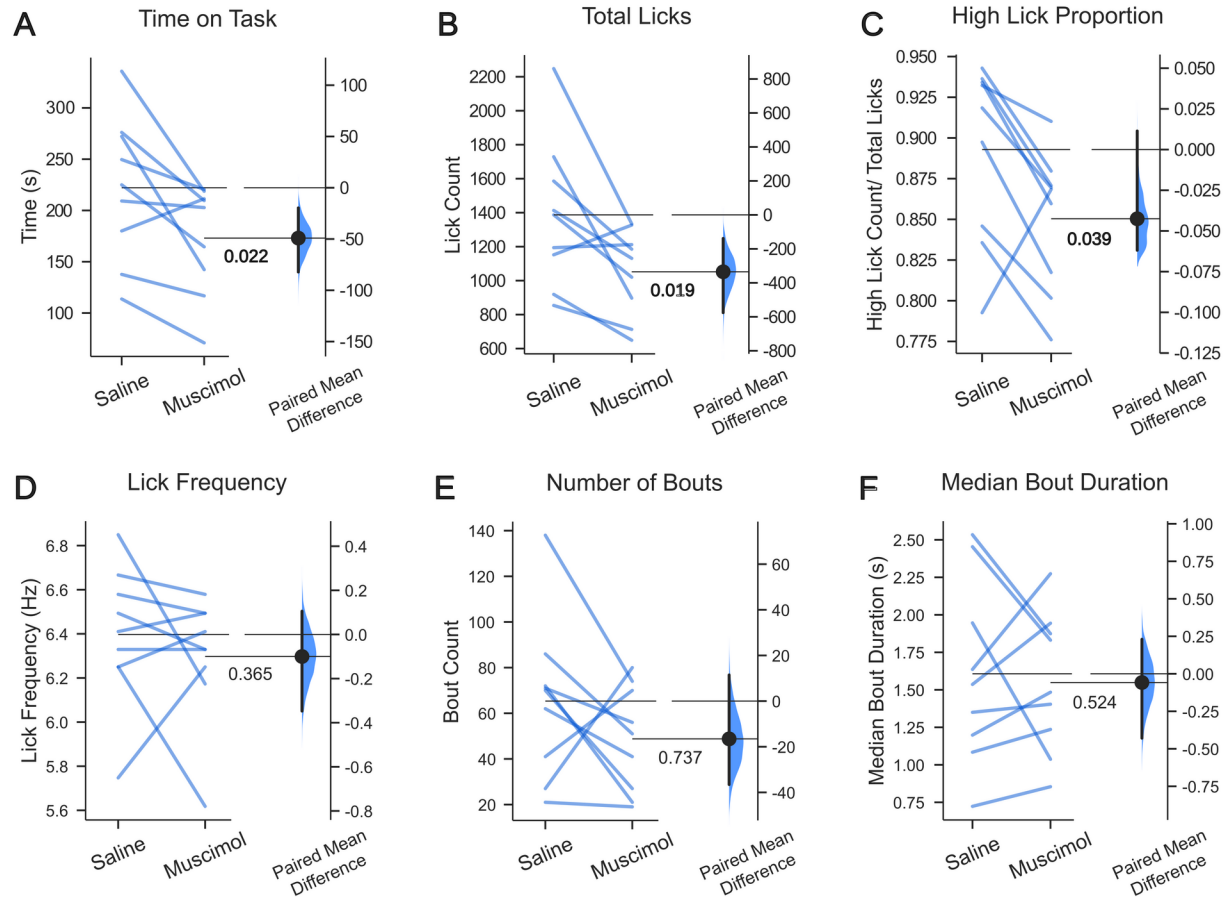

387 **Figure 3: Inactivation of rostral MFC reduces task engagement in an incentive**  
388 **contrast licking task. However, inactivation had no effects on sensorimotor function**  
389 **or fluid palatability.**

390 Bilateral infusion of muscimol reduced (A) the time spent engaged in the task, (B) the total  
391 number of licks emitted over the 30 min test sessions, and (C) the proportion of licks for  
392 the high value fluid. Inactivation did not alter (D) licking frequency or microstructural  
393 licking measures such as (E) number of licking bouts emitted or (F) the duration of licking  
394 bouts, measures that are classically associated with the palatability of a liquid reward.  
395 Estimation plots of the values comparing saline to muscimol. The raw values are plotted as  
396 Tuft slopegraphs on the top portion of the figure; each line represents a single rat's data  
397 between two conditions. The bottom portion plots the paired mean difference and a visual  
398 representation of the bootstrap confidence interval of the effect size. P-values displayed  
399 on each subpanel reflect the result of a two-sided permutation test (5000 resamples).

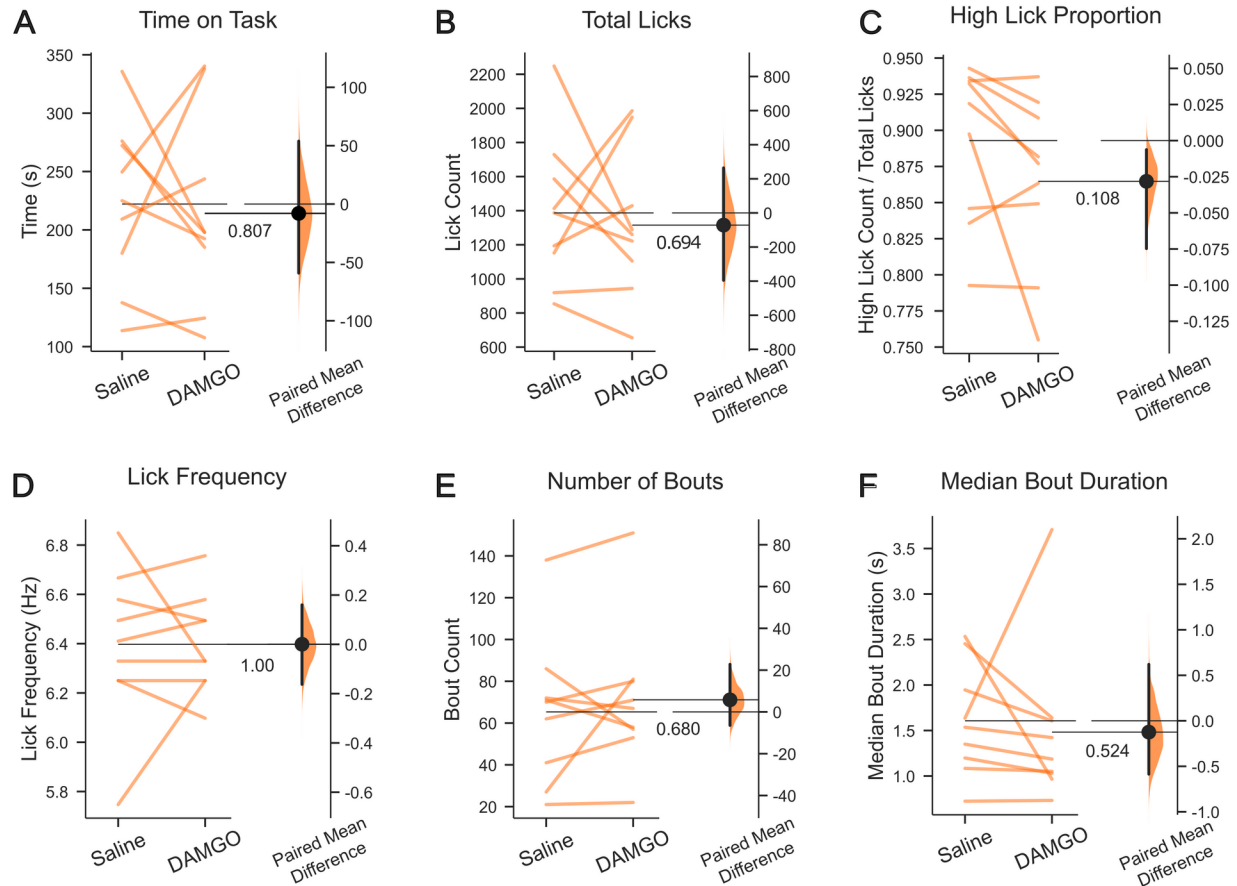

400 **Figure 4: Activation of mu-opioid receptor in rostral MFC has no effect on task**  
401 **engagement, sensorimotor function or fluid palatability in an incentive contrast**  
402 **licking task.**

403 Bilateral infusion of DAMGO didn't impact (A) the time spent engaged in the task, (B) the  
404 total number of licks emitted over the 30 min test sessions, or (C) the proportion of licks  
405 for the high value fluid. Further, it did not alter (D) licking frequency or microstructural  
406 licking measures such as (E) number of licking bouts emitted or (F) the duration of licking  
407 bouts, measures that are classically associated with the palatability of a liquid reward.

408 Estimation plots of the values comparing saline to muscimol. The raw values are plotted as  
409 Tuft slopegraphs on the top portion of the figure; each line represents a single rat's data  
410 between two conditions. The bottom portion plots the paired mean difference and a visual  
411 representation of the bootstrap confidence interval of the effect size. P-values displayed  
412 on each subpanel reflect the result of a two-sided permutation test (5000 resamples).

| Saline |              |       |            | Bouts      |          |        |  |
|--------|--------------|-------|------------|------------|----------|--------|--|
| Rat    | Time On Task | Licks | High Prop. | Lick Freq. | Duration | Number |  |
| 1      | 209.228      | 1194  | 0.943      | 5.747      | 1.350    | 70     |  |
| 2      | 272.230      | 1729  | 0.846      | 6.410      | 1.536    | 72     |  |
| 3      | 335.774      | 2248  | 0.932      | 6.667      | 1.198    | 62     |  |
| 4      | 249.616      | 1413  | 0.934      | 6.250      | 2.454    | 41     |  |
| 5      | 180.006      | 1152  | 0.897      | 6.849      | 1.946    | 27     |  |
| 6      | 276.124      | 1586  | 0.918      | 6.329      | 2.534    | 71     |  |
| 7      | 225.014      | 1387  | 0.936      | 6.494      | 1.636    | 21     |  |
| 8      | 113.674      | 919   | 0.836      | 6.579      | 0.723    | 138    |  |
| 9      | 137.660      | 854   | 0.793      | 6.250      | 1.084    | 86     |  |

| Muscimol (1 µg/µl) |              |       |            | Bouts      |          |        |  |
|--------------------|--------------|-------|------------|------------|----------|--------|--|
| Rat                | Time On Task | Licks | High Prop. | Lick Freq. | Duration | Number |  |
| 1                  | 202.800      | 1212  | 0.880      | 6.250      | 1.404    | 27     |  |
| 2                  | 142.262      | 897   | 0.802      | 6.494      | 1.944    | 21     |  |
| 3                  | 218.706      | 1334  | 0.910      | 6.579      | 1.484    | 41     |  |
| 4                  | 220.484      | 1131  | 0.860      | 5.618      | 1.831    | 70     |  |
| 5                  | 211.394      | 1327  | 0.817      | 6.173      | 1.037    | 80     |  |
| 6                  | 209.626      | 1185  | 0.869      | 6.329      | 1.874    | 56     |  |
| 7                  | 164.530      | 1020  | 0.871      | 6.329      | 2.274    | 19     |  |
| 8                  | 70.880       | 649   | 0.776      | 6.494      | 0.854    | 74     |  |
| 9                  | 116.720      | 713   | 0.868      | 6.410      | 1.236    | 51     |  |

| DAMGO (1 µg/µl) |              |       |            | Bouts      |          |        |  |
|-----------------|--------------|-------|------------|------------|----------|--------|--|
| Rat             | Time On Task | Licks | High Prop. | Lick Freq. | Duration | Number |  |
| 1               | 243.638      | 1429  | 0.919      | 6.250      | 1.186    | 80     |  |
| 2               | 197.926      | 1260  | 0.849      | 6.494      | 1.422    | 67     |  |
| 3               | 197.850      | 1289  | 0.877      | 6.757      | 1.030    | 71     |  |
| 4               | 340.336      | 1986  | 0.937      | 6.250      | 1.640    | 53     |  |
| 5               | 337.970      | 1948  | 0.755      | 6.329      | 1.606    | 81     |  |
| 6               | 185.088      | 1105  | 0.882      | 6.329      | 0.965    | 58     |  |
| 7               | 192.458      | 1222  | 0.909      | 6.579      | 3.708    | 22     |  |
| 8               | 124.444      | 944   | 0.863      | 6.494      | 0.732    | 151    |  |
| 9               | 107.620      | 655   | 0.791      | 6.098      | 1.052    | 57     |  |

413 **Table 1: Behavioral measures for each rat.**

## REFERENCES

- Amarante LM, Caetano MS, Laubach M (2017) Medial Frontal Theta Is Entrained to Rewarded Actions. *J Neurosci* 37:10757–10769.
- Amarante LM, Laubach M (2021) Coherent theta activity in the medial and orbital frontal cortices encodes reward value Rich EL, Wassum KM, eds. *eLife* 10:e63372.
- Berrios GE, Gili M (1995) Will and its disorders: a conceptual history. *History of Psychiatry*. 6:87-104.
- Castro DC, Berridge KC (2017) Opioid and orexin hedonic hotspots in rat orbitofrontal cortex and insula. *Proc Natl Acad Sci USA* 114:E9125–E9134.
- Dwyer DM (2012) EPS Prize Lecture. Licking and liking: the assessment of hedonic responses in rodents. *Q J Exp Psychol (Hove)* 65:371–394.
- Flaherty CF (1999) Incentive relativity. Cambridge University Press.
- Gabbott PL, Warner TA, Jays PR, Bacon SJ (2003) Areal and synaptic interconnectivity of prelimbic (area 32), infralimbic (area 25) and insular cortices in the rat. *Brain research*. 993:59-71.
- Gaffield MA, Christie JM (2017) Movement rate is encoded and influenced by widespread, coherent activity of cerebellar molecular layer interneurons. *Journal of Neuroscience*. 37:4751-65.
- Giacomini JL, Geiduschek E, Selleck RA, Sadeghian K, Baldo BA (2021) Dissociable control of  $\mu$ -opioid-driven hyperphagia vs. food impulsivity across subregions of medial prefrontal, orbitofrontal, and insular cortex. *Neuropsychopharmacology* 46:1981–1989.
- Giacomini JL, Sadeghian K, Baldo BA (2022) Eating driven by the gustatory insula: contrasting regulation by infralimbic vs. prelimbic cortices. *Neuropsychopharmacology*.
- Gutierrez R, Simon SA, Nicolelis MAL (2010) Licking-induced synchrony in the taste-reward circuit improves cue discrimination during learning. *J Neurosci* 30:287–303.
- Ho J, Tumkaya T, Aryal S, Choi H, Claridge-Chang A (2019) Moving beyond P values: data analysis with estimation graphics. *Nat Methods* 16:565–566.
- Hoover WB, Vertes RP (2007) Anatomical analysis of afferent projections to the medial prefrontal cortex in the rat. *Brain Structure and Function*. 212:149-79.
- Horst NK, Laubach M (2013) Reward-related activity in the medial prefrontal cortex is driven by consumption. *Front Neurosci* 7:56.
- Lau BK, Ambrose BP, Thomas CS, Qiao M, Borgland SL (2020) Mu-Opioids Suppress GABAergic Synaptic Transmission onto Orbitofrontal Cortex Pyramidal Neurons with Subregional Selectivity. *J Neurosci* 40:5894–5907.

- Lewis ME, Pert A, Pert CB, Herkenham M (1983) Opiate receptor localization in rat cerebral cortex. *J Comp Neurol* 216:339–358.
- Mena JD, Sadeghian K, Baldo BA (2011) Induction of hyperphagia and carbohydrate intake by  $\mu$ -opioid receptor stimulation in circumscribed regions of frontal cortex. *J Neurosci* 31:3249–3260.
- Mena JD, Selleck RA, Baldo BA (2013) Mu-opioid stimulation in rat prefrontal cortex engages hypothalamic orexin/hypocretin-containing neurons, and reveals dissociable roles of nucleus accumbens and hypothalamus in cortically driven feeding. *J Neurosci* 33:18540–18552.
- Parent MA, Amarante LM, Liu B, Weikum D, Laubach M (2015a) The medial prefrontal cortex is crucial for the maintenance of persistent licking and the expression of incentive contrast. *Front Integr Neurosci* 9:23.
- Parent MA, Amarante LM, Swanson K, Laubach M (2015b) Cholinergic and ghrelinergic receptors and KCNQ channels in the medial PFC regulate the expression of palatability. *Front Behav Neurosci* 9:284.
- Paxinos G, Watson C (2014) *The Rat Brain in Stereotaxic Coordinates* (7th ed.). San Diego, CA: Academic Press.
- Petykó, Z., Tóth, A., Szabó, I., Gálosi, R., & Lénárd, L (2009). Neuronal activity in rat medial prefrontal cortex during sucrose solution intake. *Neuroreport*, 20(14):1235-1239.
- Petykó Z, Gálosi R, Tóth A, Máté K, Szabó I, Szabó I, Karádi Z, Lénárd L (2015) Responses of rat medial prefrontal cortical neurons to Pavlovian conditioned stimuli and to delivery of appetitive reward. *Behavioural Brain Research*. 287:109-19.
- Selleck RA, Baldo BA (2017) Feeding-modulatory effects of mu-opioids in the medial prefrontal cortex: a review of recent findings and comparison to opioid actions in the nucleus accumbens. *Psychopharmacology (Berl)* 234:1439–1449.
- Selleck RA, Giacomini J, Buchholtz BD, Lake C, Sadeghian K, Baldo BA (2018) Modulation of appetitive motivation by prefrontal cortical mu-opioid receptors is dependent upon local dopamine D1 receptor signaling. *Neuropharmacology* 140:302–309.
- Swanson L. *Brain maps: structure of the rat brain*. Gulf Professional Publishing; 2004.
- Swanson K, Goldbach HC, Laubach M (2019) The rat medial frontal cortex controls pace, but not breakpoint, in a progressive ratio licking task. *Behav Neurosci* 133:385–397.
- Yoshida A, Taki I, Chang Z, Iida C, Haque T, Tomita A, Seki S, Yamamoto S, Masuda Y, Moritani M, Shigenaga Y (2009) Corticofugal projections to trigeminal motoneurons innervating antagonistic jaw muscles in rats as demonstrated by anterograde and retrograde tract tracing. *Journal of Comparative Neurology*. 514:368-86.
